# Supplementary material
Source: publisher figshare collection journal article supplement (https://rs.figshare.com/ndownloader/files/15175202)
Supplement: Supplementary file 1 [file 15175202]

## Sheet: Sheet1
Specimen: FPDM-V9776						Specimen: MSN-PV 20566						Specimen: Fig.S6B
Fish	x	y	angle	length		Fish	x	y	angle	length		Fish	x	y	angle	length
1	9.84105	133.574	157.521	18.4855		1	621.833	1479.72	54.964	82.642		1	237.439	-1029.72	36.11	27.9203
2	46.4423	98.0335	-171.588	17.0908		2	380.722	1579.67	18.642	68.1302		2	240.569	-1129.67	-98.13	20.873
3	45.0918	87.9812	146.634	17.1856		3	513.333	1599.89	115.866	57.0484		3	238.749	-1149.89	18.041	20.0463
4	52.6572	91.3495	166.739	19.1116		4	711.667	1590.56	67.964	70.4822		4	223.393	-1140.56	-8.13	15.4386
5	51.3115	105.15	-155.709	14.6609		5	631.556	1620.5	-173.517	103.328		5	216.552	-1170.5	72.031	29.6896
6	59.5132	101.498	174.428	19.61		6	482.222	1688.17	-41.576	64.4614		6	296.553	-1238.17	86.015	26.7014
7	65.91	95.5149	163.187	17.2329		7	654.889	1695.94	-168.14	79.4741		7	301.248	-1245.94	63.835	27.9752
8	63.9627	85.1279	166.057	17.3267		8	782.056	1618.17	19.537	76.7519		8	292.405	-1168.17	-63.891	24.5579
9	62.2285	76.0366	167.372	22.0236		9	920.5	1581.61	-76.849	85.4638		9	272.809	-1131.61	77.042	25.3165
10	67.0193	105.968	-178.847	17.8393		10	881.222	1479.33	-131.186	49.6074		10	269.534	-1029.33	65.95	28.93
11	84.9999	119.404	-172.875	17.9286		11	771.944	1698.67	179.021	91.0132		11	256.271	-1248.67	-66.014	27.1232
12	94.5256	115.771	170.85	17.8005		12	837.278	1715.78	-164.694	76.6064		12	286.346	-1265.78	-96.809	44.1971
13	88.5745	112.619	172.023	18.5406		13	873.833	1720.83	-116.222	58.0891		13	285.855	-1270.83	-122.501	16.0506
14	81.7287	110.124	161.565	14.4891		14	448.778	1827.19	-120.964	86.3691		14	276.139	-1377.19	-128.29	23.784
15	87.2762	106.769	173.698	19.5689		15	336.389	1908.47	-145.67	77.553		15	283.29	-1458.47	-137.093	23.2506
16	85.7777	103.115	-176.897	19.47		16	440.028	1932.97	78.024	78.6333		16	343.768	-1482.97	-127.6	23.9751
17	87.611	97.4112	170.8	16.9546		17	463.361	1992.28	129.596	81.5119		17	350.427	-1542.28	51.077	44.4816
18	97.9705	89.8681	164.141	21.3791		18	527.852	2000.96	-141.582	86.408		18	336.836	-1550.96	102.095	26.5717
19	96.4729	84.8837	180	22.0633		19	608.741	2010.43	-165.311	82.5673		19	352.447	-1560.43	153.733	28.1214
20	87.5315	78.4509	-28.342	22.1142		20	663.185	2071.35	156.602	88.1362		20	320.898	-1621.35	-170.944	43.0021
21	108.029	122.119	-151.97	18.4647		21	636.741	1916.31	-57.848	96.0213		21	366.948	-1466.31	-32.005	18.5766
22	112.235	120.004	-146.86	17.0311		22	668.111	1933.94	-15.452	99.0741		22	361.453	-1483.94	90.73	17.1771
23	101.22	112.34	-147.002	10.8993		23	582.944	1856.94	-126.69	49.3127		23	370.514	-1406.94	55.713	11.5672
24	116.911	109.462	138.334	17.2831		24	749.972	1823.11	-66.371	81.6566		24	356.759	-1373.11	-0.288	21.7244
25	111.793	106.419	147.995	16.5198		25	807.333	1910.61	-40.732	73.9013		25	362.19	-1460.61	-73.098	20.6674
26	111.424	102.729	148.885	15.3702		26	764.75	1946.97	-43.299	111.693		26	370.542	-1496.97	76.621	20.719
27	103.578	101.395	178.409	21.2211		27	774.278	2021.83	-41.379	87.0691		27	377.283	-1571.83	-103.392	16.4431
28	111.996	98.9762	-165.735	14.4831		28	878.889	2052.36	21.251	75.2484		28	439.035	-1602.36	-64.616	23.6677
29	119.867	94.5008	163.754	18.4483		30	940.333	1829.33	171.656	58.9571		29	486.013	-1379.33	-156.571	35.693
30	113.44	87.9083	162.112	23.1273		31	1019.47	1923.06	63.153	70.7871		30	432.576	-1473.06	-123.275	20.8921
31	123.958	83.3981	-42.879	18.0796		32	1030.07	2038.56	131.878	90.783		31	218.553	-1588.56	-43.919	32.7357
32	116.201	83.0403	162.553	17.3169		33	1083.54	2067.04	-128.254	51.7767		32	211.021	-1617.04	-137.372	26.1136
33	121.687	77.6877	167.355	18.7498		34	1000.09	1734.44	133.586	89.6684		33	220.245	-1284.44	-122.43	23.4102
34	127.885	73.9812	177.114	14.0968		35	1057.39	1767.11	-47.261	83.8514		34	201.141	-1317.11	-110.163	14.8856
35	122.317	72.5108	169.099	16.1271		36	1078.65	1823.5	-126.203	93.4951		35	158.675	-1373.5	23.542	28.6979
36	126.562	70.7099	-167.981	18.6697		37	1084.87	1909.7	-110.2	87.1827
37	126.031	131.459	-168.198	16.0879		38	1134	1903.87	-168.254	79.982
38	132.997	124.771	-179.615	17.6815		39	1155.26	1849.94	104.621	74.2008
39	125.078	120.946	-168.69	16.205		41	1161.48	1753.37	-70.346	69.3747
40	125.722	118.269	-163.342	15.4656		42	1190.78	1714.87	-68.199	71.6854
41	135.566	118.843	-157.557	17.4282		43	974.815	1576.56	96.089	58.3536
42	127.509	110.716	172.915	20.9048		44	1137.63	1550.76	142.237	70.3757
43	143.824	116.871	-161.811	17.1625		45	1003.2	1488.28	68.299	81.9894
44	130.85	106.525	-162.496	16.0662		46	1004.37	1467.67	169.509	85.428
45	145.767	110.092	175.079	17.6462		47	1050.39	1449	-19.047	68.9578
46	129.714	100.722	-166.759	16.6127		48	1131.67	1447.83	-110.462	110.998
47	131.035	92.4741	163.74	17.7197		49	1188.7	1442.26	31.329	84.0397
48	132.983	87.6514	167.709	21.5766		50	1072.3	1414.91	121.264	51.177
49	141.871	82.712	-167.768	17.5903		51	1043.78	1373.43	-79.089	65.2353
50	142.735	77.5963	-166.504	15.2979		52	1079.81	1345.04	65.898	64.9701
51	157.902	131.535	-13.846	17.3666		53	1150.98	1310.04	-162.474	77.1501
52	153.945	126.175	174.618	16.4184		54	1170.81	1339.85	-30.069	68.7524
53	153.518	123.798	-165.362	16.0979		55	1095.24	1263.11	159.362	63.9046
54	169.375	122.575	176.566	17.6116		56	1117.67	1224.48	-138.094	81.8619
55	177.447	128.884	-164.643	17.3669		57	1164.07	1249.11	8.13	71.7166
56	168.585	118.368	-174.618	16.3781		58	1188.96	1170.3	12.68	63.7778
57	156.065	115.304	-168.389	17.7942		59	1134	1135.3	-114.905	72.1412
58	169.326	111.246	166.228	12.5207		60	1006.06	1143.2	-7.206	68.2726
59	163.02	109.202	166.877	19.566		61	1120.65	1064.65	38.581	88.5508
60	152.796	107.97	-179.421	11.5587		62	977.278	1019.41	-115.866	85.2266
61	150.999	105.435	168.433	20.4869		63	804.741	1021.35	50.323	88.564
62	143.381	102.173	166.945	16.5862		64	712.315	1078.39	-151.336	66.4806
63	149.722	101.759	-167.851	17.331		65	874.481	1108.07	-77.845	51.968
64	157.568	101.678	-177.709	14.6231		66	798.519	1163.94	-55.154	74.7211
65	146.213	94.0257	-169.875	17.1472		67	734.481	1189.48	-161.966	70.6806
66	154.419	95.1847	166.361	16.3339		68	750.815	1235.89	-104.178	76.4618
67	158.085	92.1626	-156.109	18.9418		69	698.056	1313.28	-102.907	76.2922
68	153.281	91.1183	-172.219	19.1383		70	844.667	1285.67	84.611	41.1234
69	158.248	67.8451	-167.969	22.225		71	876.556	1328.57	103.241	81.2474
70	154.402	83.667	25.934	19.1053		72	944.611	1001.91	-19.733	75.7758
71	154.469	71.69	-170.074	18.9852		73	911.297	1142.56	-128.946	73.0427
72	158.642	73.4933	177.594	13.8125		74	926.074	1185.59	-127.535	80.5856
73	156.34	76.9258	-177.969	16.5273		75	945.259	1295.52	5.08	70.2761
74	164.822	78.5899	171.529	16.8253		76	936.315	1326.24	-154.29	70.3897
75	159.979	49.4214	-176.698	12.2644		77	1236.93	1149.81	120.343	73.6408
76	170.142	13.9851	160.32	17.1189		78	1209.7	1139.83	-159.624	57.9888
77	185.774	124.049	-135.881	16.1207		79	1248.46	1102.89	91.146	77.7887
78	190.648	118.438	-172.147	13.8701		80	1270.11	1248.59	-22.306	65.772
79	192.845	112.736	160.017	13.5705		81	1300.7	1280.48	-98.746	81.3283
80	187.582	111.985	161.318	17.4383		82	1269.59	1311.46	-50.793	76.8149
81	181.036	113.418	-160.378	14.4374		83	1235.37	1354.37	32.276	69.6383
82	189.399	108.62	171.82	18.833		84	1290.07	1362.67	-138.576	87.801
83	163.019	103.026	-140.812	13.8159		85	1224.09	1442	51.882	64.4638
84	177.445	104.14	-171.198	18.5216		86	1300.7	1510.06	-108.034	69.9393
85	173.248	98.9559	-175.2	15.4051		87	1221.11	1774.5	33.158	69.4626
86	179.873	92.8171	162.474	20.8326		88	1230.31	1977.63	-173.53	76.4143
87	176.827	89.8067	176.677	18.5382		89	1272.83	2138.11	163.74	77.5289
88	179.511	83.545	176.322	16.5124		90	1488.28	1053.69	143.246	76.9222
89	188.177	83.5261	176.885	17.3483		91	1581.03	1110.28	159.087	102.776
90	173.955	78.886	153.569	22.2001		92	1464.17	1114.94	147.155	73.136
91	180.121	78.1858	174.012	16.9607		94	1567.22	1167.44	-1.397	63.7964
92	184.657	75.4857	179.474	12.8045		95	1558.86	1204.39	-110.556	66.591
93	175.974	71.7722	-172.304	17.5922		96	1482.64	1221.31	100.204	79.4803
94	186.191	67.7773	-174.417	15.7968		97	1329.42	1270.89	-24.905	72.3847
95	195.185	48.575	161.318	17.2357		98	1377.06	1275.94	91.931	69.2619
96	189.74	100.974	169.624	16.9828		99	1455.22	1310.94	36.285	76.2261
97	187.418	95.6578	174.904	18.3883		100	1498	1305.89	-63.184	79.3069
98	193.422	99.3717	-165.757	15.6015		101	1515.5	1309	-173.333	60.2964
99	193.885	95.6323	53.046	15.8934		102	1434.81	1385.61	0	91.3889
100	214.135	135.408	-154.049	19.3589		103	1552.44	1388.53	132.628	93.3116
101	215.833	129.354	-159.848	13.7305		104	1599.31	1417.69	-54.395	77.5771
102	224.071	125.006	-178.039	17.7011		105	1327.86	1443.17	-157.855	72.5768
103	204.232	124.624	-165.417	15.117		106	1342.06	1473.31	74.578	46.4217
104	204.7	119.415	-168.457	17.043		107	1329.81	1523.86	149.315	82.1668
105	209.953	115.524	175.601	13.7595		108	1552.06	1531.25	125.929	66.591
106	206.569	111.448	169.216	19.9366		109	1561	1616.03	-109.676	136.657
107	205.249	109.531	-165.606	13.6104		110	1503.25	1625.94	-137.586	85.0461
108	196.257	105.114	-176.209	19.5587		111	1495.67	1690.5	-117.031	42.7848
109	216.706	107.668	-151.189	18.5978		112	1345.36	1639.94	-86.129	103.708
110	227.119	108.96	-175.764	16.2073		113	1312.5	1880.67	17.723	79.2034
111	209.567	99.6357	-159.404	19.5681		114	1352.17	1972.25	138.601	78.5447
112	223.078	103.628	-5.812	19.8546		115	1356.83	1954.75	100.784	66.1259
113	201.722	92.9512	-170.651	19.3221		116	1371.61	2036.81	150.819	68.7851
114	210.296	93.4838	-167.146	17.8575		117	1389.69	2043.22	-136.528	82.243
115	199.844	89.0986	175.307	15.6148		118	1511.22	2097.47	-133.472	82.243
116	203.511	85.8931	-165.069	12.7723		119	1645.58	1058.75	177.483	70.476
117	196.606	79.1146	-170.538	15.0349		120	1713.64	1080.33	-54.246	72.1086
118	220.221	82.0379	161.154	20.5911		121	1759.33	1045.53	-105.819	48.8779
119	214.278	81.5055	157.294	17.7063		122	1794.92	1035.81	27.525	62.4384
120	213.803	74.8888	154.654	17.5299		123	1722.58	1119.22	-50.029	69.2627
121	217.764	67.6222	169.492	15.0848		124	1800.75	1171.14	126.107	82.3729
122	228.542	57.0551	162.491	20.6887		125	1657.64	1244.64	-177.337	66.5918
123	233.201	121.979	-179.284	18.615		126	1605.72	1274.39	-20.603	110.513
124	224.309	118.337	159.063	14.4581		128	1845.67	1240.94	145.62	71.6232
125	222.977	115.414	166.945	16.7529		129	1788.89	1254.36	-161.761	72.1879
126	230.008	114.52	-166.737	17.1113		130	1864.72	1297.92	-142.556	108.976
127	224.297	90.7528	150.21	18.6213		131	1862.39	1278.86	119.836	60.6332
128	221.841	90.0632	-179.61	17.4048		132	1768.28	1319.11	-115.942	64.0049
129	227.124	97.9411	175.668	15.7621		133	1777.03	1401.36	112.027	109.405
130	237.24	98.9715	-176.04	15.5894		134	1800.75	1398.64	107.418	83.4019
131	235.518	93.3626	170.969	18.1454		135	1710.33	1487.69	150.499	68.1092
132	239.227	90.9286	-171.085	12.0616		136	1838.86	1453.47	-149.954	91.7926
133	242.193	138.614	-165.743	14.8687		137	1802.11	1501.69	-174.226	69.6158
134	248.952	133.832	-176.775	16.9242		138	1875.81	1503.25	110.344	73.3281
135	239.748	129.827	172.924	17.477		139	1728.81	1538.44	-168.48	125.003
136	249.368	126.555	-176.356	18.8537		140	1799.78	1563.53	71.896	84.7319
137	248.097	120.176	-119.846	16.586		141	1848.78	1616.81	90.591	75.0594
138	240.044	112.421	-176.04	15.4941		142	1689.92	1719.47	150.668	93.8264
139	255.396	113.775	-179.63	18.3595		143	1415.81	1813.52	-73.899	78.4218
140	244.726	109.839	-151.526	15.663		144	1426.7	1802.89	109.618	83.4688
141	250.64	109.651	180	10.5737		145	1472.59	1778.78	118.46	94.6447
142	263.374	113.701	-156.084	15.1723		146	1526.78	1834	-42.31	81.8619
143	249.424	101.62	151.75	17.7849		147	1569.81	1825.19	171.573	84.4037
144	261.811	103.734	168.815	21.6745		148	1666	1880.15	143.616	73.7333
145	252.861	96.8513	-158.412	17.4324		149	1699.96	1891.56	7.289	67.4676
146	256.911	94.2563	-157.313	15.3357		150	1750	1870.81	-115.641	86.7417
147	241.284	87.369	-163.264	17.5366		151	1737.81	1860.7	-168.366	54.6124
148	262.63	92.1091	-144.513	15.5063		152	1716.04	1830.37	62.622	97.6383
149	253.452	87.4531	-172.003	14.6725		153	1701.78	1818.7	-101.427	75.047
150	243.699	81.0585	-174.174	17.2956		154	1687	1845.15	-88.172	72.639
151	252.456	81.3758	-7.431	16.8468		155	1678.19	1853.44	128.454	67.5368
152	246.255	74.9903	169.408	14.7214		156	1703.85	2059.81	-77.242	85.0368
153	266.439	89.0827	-144.413	15.6689		157	1751.3	2098.96	37.528	67.3073
154	263.935	139.294	-168.048	16.3405		158	2037.39	1043	173.83	86.8366
155	269.076	135.908	-172.405	14.1716		159	2135.78	1088.31	-2.161	82.4896
156	270.389	131.403	-175.567	15.2595		160	2199.17	1091.81	-117.242	88.0102
157	266.995	128.826	-174.611	18.6237		161	2127.22	1177.36	129.382	67.1199
158	266.936	126.136	-155.072	18.2762		162	2170.19	1219.56	-91.302	68.4546
159	271.664	125.783	-175.011	14.864		163	2204.61	1267.19	-123.024	93.0907
160	262.095	118.953	179.306	19.788		164	2012.69	1303.94	60.164	61.1644
161	273.687	122.359	-151.169	14.4405		165	2040.5	1319.69	-166.483	83.1032
162	272.712	120.06	-169.287	17.8857		166	1961.36	1429.17	-73.237	67.5337
163	274.866	118.873	-159.499	14.3698		167	1926.17	1502.86	29.211	83.0628
164	268.155	109.341	-162.3	17.1819		168	1981.39	1575.19	-170.647	66.9394
165	273.915	109.243	-162.132	18.9048		169	1949.69	1646.56	-62.162	78.4638
166	284.547	104.709	168.495	13.461		170	1938.03	1656.28	-95.143	78.1278
167	280.402	102.548	164.624	14.4617		171	2049.06	1640.14	155.045	86.4811
168	269.111	100.568	-169.509	16.0501		172	2016.97	1716.36	12.583	88.7911
169	284.527	94.9403	153.26	17.4817		173	2113.61	1664.06	-70.017	72.8296
170	285.289	89.6727	161.009	19.0579		174	2149.97	1654.72	-19.44	111.806
171	273.458	82.6904	-166.135	19.1687		175	2203.64	1633.33	17.103	63.1019
172	277.008	89.2112	-163.479	14.3494		176	2127.22	1749.61	-78.486	85.7251
173	291.334	85.7524	-177.663	17.6563		177	2211.61	1698.28	-66.801	65.1576
174	285.397	80.5675	-163.88	21.2299		178	2170.39	1820.97	-69.829	81.5679
175	273.718	73.8162	174.766	15.7552		179	2184.19	1853.64	24.775	67.333
176	276.555	65.9047	174.703	17.9682		180	2093.97	1890.97	-131.634	74.8953
177	278.018	55.0154	161.878	20.2433		181	2054.69	1886.69	94.475	90.1367
178	272.94	51.7258	158.499	16.5299		182	1942.69	1904.19	-35.475	83.0021
179	257.924	49.8379	169.103	22.7815		183	1869	1814.75	154.134	28.6961
180	286.486	142.628	175.781	14.8318		184	1972.64	1891.17	26.565	53.5663
181	290.35	140.688	-166.779	20.0831		185	2006.86	1928.11	-32.125	78.6528
182	292.68	136.975	-161.565	17.7859		186	1990.72	1954.17	57.011	105.709
183	300.63	131.948	-177.064	18.6701		187	2162.22	1939.39	177.58	55.2712
184	293.405	127.796	170.681	23.5357		188	1840.81	1942.31	-92.203	60.3392
185	301.783	127.442	180	15.0002		189	2004.53	2036.81	-59.133	78.9686
186	291.511	123.015	-160.641	18.4849		190	2087.17	2072.39	-71.241	87.0691
187	296.748	118.762	-175.943	16.5262		191	2196.25	2089.11	21.705	86.5861
188	288.623	114.234	169.196	15.8468		192	2231.96	1103.15	-165.593	87.9114
189	284.016	115.508	-152.266	12.711		193	2306.11	1179.37	53.791	54.5533
190	290.042	111.849	-163.877	15.5449		194	2246.74	1278.67	-107.168	99.8807
191	306.034	115.705	-169.765	17.3285		195	2345.26	1059.07	-45.881	71.1449
192	297.899	110.997	-161.985	15.711		196	2410.33	1046.11	22.036	70.4822
193	302.586	109.236	-148.392	15.9747		197	2469.96	1038.33	-76.759	67.6643
194	297.484	102.514	-175.567	15.2102		198	2522.07	1081.89	-103.903	80.6128
195	293.463	97.2791	179.637	18.8381		199	2536.85	1094.59	-4.514	59.2566
196	308.627	141.596	-154.733	16.219		200	2597.26	1088.63	-155.966	62.9137
197	315.317	138.298	-165.579	16.9115		201	2500.3	1139.19	14.178	76.4618
198	326.003	138.559	-161.192	17.2106		202	2520	1166.93	-74.141	71.582
199	321.468	132.747	-160.168	15.4289		203	2460.37	1170.04	152.354	73.976
200	308.882	122.774	176.356	18.4303		204	2414.48	1165.89	150.018	70.3601
201	319.337	128.106	-165.005	20.2472		205	2539.44	1219.3	-136.975	79.604
202	330.237	133.266	-163.346	14.4721		206	2589.48	1274	-70.484	65.121
203	315.23	120.974	-177.31	17.5041		207	2598.56	1370.44	-53.354	79.6444
204	324.274	125.278	-153.677	12.6953		208	2597.78	1407	-54.713	62.1468
205	336.036	126.01	-168.69	15.0067		209	2469.96	1454.7	114.286	69.6049
206	311.998	110.113	-161.35	19.7212		210	2495.37	1469.22	45.909	68.9453
207	325.875	116.946	-178.187	18.7768		211	2252.96	1535.59	-148.092	97.3949
208	335.244	121.238	-175.914	21.5165		212	2257.63	1589.52	11.551	108.504
209	315.417	104.455	-154.344	16.7903		213	2399.19	1643.96	-26.565	88.5819
210	311.337	99.1607	176.878	19.5357		214	2591.56	1570.85	-105.69	72.0813
211	323.601	100.456	-172.176	15.4653		215	2214.85	1754.41	-142.576	112.422
212	304.9	94.2856	179.012	13.6139		216	2227.56	1770.48	27.646	110.872
213	319.954	93.2474	169.497	21.4816		217	2429.52	1712.15	174.289	93.8521
214	316.056	89.4635	174.369	16.9335		218	2506.26	1755.7	-68.429	71.7376
215	321.893	88.3818	-178.877	18.0956		219	2464.52	1767.11	-98.366	80.2247
216	314	85.2145	173.868	14.2929		220	2580.41	1732.37	60.725	58.9766
217	317.707	81.7796	176.52	17.6275		221	2308.19	1780.59	-163.61	54.985
218	314.899	72.5256	147.95	16.0589		222	2250.89	1876.26	168.959	97.7254
219	306.431	79.9183	171.694	16.1602		223	2289	1964.67	140.932	85.5159
220	317.108	59.9401	169.735	15.1572		224	2261.52	2025.85	144.574	92.9468
221	329.105	149.917	-147.529	16.6771		225	2527.52	1885.85	-36.363	87.5296
222	342.634	150.774	-151.557	16.2133		226	2548.26	1897.26	-139.764	79.4127
223	359.068	149.901	-177.469	21.5002		227	2653	1063.48	5.136	69.7153
224	338.873	144.504	-166.551	16.8567		228	2663.63	1076.44	-26.274	68.8714
225	349.183	144.207	-164.055	15.2906		229	2628.63	1108.85	177.879	63.2932
226	357.659	132.5	-174.611	19.2108		230	2811.15	1112.48	39.644	70.777
227	365.755	140.782	179.293	18.8781		231	2615.41	1227.59	163.887	73.0084
228	342.378	133.427	-156.349	17.4857		232	2752.81	1220.59	-30.018	80.5856
229	355.615	127.669	-172.082	18.1151		233	2886.85	1226.56	36.87	89.6
230	346.449	122.427	-153.277	18.992		234	2951.67	1202.44	39.401	56.3663
231	336.799	114.194	-130.503	14.6329		235	3042.93	1084.48	-126.119	70.5258
232	329.508	111.976	-131.147	15.9057		236	2752.56	1311.85	1.577	85.0764
233	331.395	108.581	-151.699	15.4386		237	2837.07	1356.96	148.055	77.9932
234	336.358	99.0124	-168.968	19.1466		238	2795.07	1370.7	-145.138	84.2816
235	349.622	92.5003	162.269	18.8145		239	2928.85	1365	-93.215	69.6049
236	342.194	91.2909	159.986	18.6271		241	3059.26	1358.26	-1.507	59.6384
237	361.529	121.56	175.365	17.4988		242	2913.56	1402.85	174.92	70.2761
238	359.039	118.1	178.652	19.8656		243	2909.15	1421	-20.304	83.0216
239	350.233	115.232	-178.983	19.8588		244	2852.37	1429.04	-110.225	62.3303
240	345.145	111.202	-157.62	15.0727		245	2654.56	1473.63	-18.838	70.0156
241	346.375	105.426	-168.518	15.2655		246	2727.93	1453.15	-98.13	87.9239
242	361.826	108.677	-148.591	15.5349		247	2753.59	1507.33	93.945	68.0524
243	385.688	122.051	174.98	17.2367		248	2849.78	1476.22	-46.38	90.9557
244	392.661	124.924	174.726	15.325		249	2950.37	1475.7	63.435	94.3787
245	378.764	126.534	-174.094	20.5721		250	2901.63	1517.44	122.164	89.2049
246	400.144	130.262	175.662	17.0613		251	2645.74	1579.67	-120.101	62.2564
247	400.445	127.783	174.193	13.915		252	2713.67	1653.81	29.168	38.0746
248	408.309	130.589	-9.377	12.9228		253	2889.96	1615.44	-28.465	73.3297
249	399.368	134.619	-175.601	17.2881		254	2895.93	1659	-132.709	95.7802
250	388.986	135.021	-160.186	16.9808		255	3034.11	1703.59	-110.956	77.8058
251	372.221	129.67	-178.315	15.8416		256	2930.67	1696.85	128.089	109.648
252	375.886	134.523	-164.592	15.4667		257	2700.19	1773.59	160.448	88.2459
253	386.109	138.397	-174.618	16.1965		258	2646.26	1823.89	138.013	73.8064
254	398.953	143.139	172.363	21.3159		259	2631.74	1917.48	-117.86	62.1616
255	423.702	133.171	-171.806	15.122		260	2737.78	1926.56	-107.21	91.8377
256	412.579	91.2444	-69.74	19.3517		261	2844.07	1858.37	-51.911	72.7199
257	107.022	76.3216	171.506	18.4055		262	2810.11	1982.04	0	64.2966
258	89.9139	55.6283	171.927	16.8137		263	2902.93	2011.07	10.552	81.1611
259	45.5624	47.0085	156.582	20.0787		264	3074.56	1218	13.496	79.9867
						265	3146.5	1186.5	166.477	63.1968
						266	3117.33	1253.78	-143.973	84.6316
						267	3149.61	1327.67	168.166	83.44
						268	3195.11	1393.78	135	60.4979
						270	3061.85	1602.74	-177.397	51.3753
						271	3175.15	1567.22	94.316	82.6786
						272	3204.96	1576.81	-52.306	64.624
						273	3174.37	1616.74	-50.11	67.3851
						274	3165.81	1638.78	123.968	89.3076
						275	3277.56	1594.19	-157.348	107.174
						276	3304	1585.11	112.416	67.2093
						277	3337.19	1634.11	121.667	98.0016
						278	3323.19	1704.37	-105.739	89.4577
						279	3247.22	1713.44	169.951	62.1468
						280	3205.48	1743	34.359	92.4793
						281	3080.52	1802.11	-19.156	78.3806
						282	3158.81	1825.44	98.673	92.8394
